# Supplementary material for: Remdesivir Treatment for COVID 19 in Pregnant Patients with Moderate to Severe Symptoms: Serial Case Report
Source: MDPI journal article supplement (doi:10.3390/idr13020042), 2021-05-17
Supplement: s1 [file s1]

| Laboratory Component                            |                           | A        |          |         |       |       |        | B     |       | C     | D     |       |           | E       |      |
|-------------------------------------------------|---------------------------|----------|----------|---------|-------|-------|--------|-------|-------|-------|-------|-------|-----------|---------|------|
| Reference Range and Units                       | Reference Range and Units | 20/12/20 | 24/12/20 | 21/2/21 | D1    | D2    | D3     | D1    | D2    | D1    | D1    | D2    | D3        | 11/1/21 | D    |
| Oxygen Requirement (NC)                         | None                      |          |          |         |       |       |        |       |       |       |       |       |           |         |      |
| Hemoglobin (g/dL)                               | 11.7-15.7                 | 12.9     | 11.3     | 12.7    | 12.1  | 11.4  | 12.7   | 13.6  | 12.7  | 12.0  | 10.3  | 10.7  | 10.1      | 10.5    | 10.1 |
| Erythrocytes (10 <sup>9</sup> /uL)              | 3.80 – 4.80               | 4.33     | 3.72     | 3.97    | 4.14  | 3.87  | 4.34   | 4.25  | 3.97  | 4.63  | 3.95  | 4.08  | 3.81      | 3.65    | 3.53 |
| Thrombocytes (10 <sup>9</sup> / uL)             | 150-410                   | 14.21    | 13.30    | 360     | 13.59 | 20.66 | 18.92  | 14.18 | 19.68 | 5.31  | 8.86  | 7.67  | 12.83     | 270     | 226  |
| WBC Count (10 <sup>9</sup> /uL)                 | 4.0-11.0                  | 298      | 284      | 19.86   | 371   | 483   | 646    | 344   | 360   | 307   | 265   | 313   | 355       | 8.25    | 6.14 |
| MCV/VER (fL)                                    | 83.0-101.0                | 88       | 86.3     | 89.9    | 85.3  | 84.2  | 86.9   | 88.7  | 89.9  | 79.3  | 79.5  | 79.4  | 79.5      | 84.1    | 83.0 |
| MCH/HER (pg)                                    | 27.0-32.0                 | 29.8     | 30.4     | 32.0    | 29.2  | 29.5  | 29.3   | 32.0  | 32.0  | 25.9  | 26.1  | 26.2  | 26.5      | 28.8    | 28.6 |
| MCHC/KHER (g/dL)                                | 31.5-34.5                 | 33.9     | 35.2     | 35.6    | 34.3  | 35.0  | 33.7   | 36.1  | 35.6  | 32.7  | 32.8  | 33    | 33.3      | 34.2    | 34.5 |
| Basophil (%)                                    | 0-2                       | 0.5      | 0.5      | 0.3     | 0.6   | 0.5   | 0.1    | 0.8   | 0.3   | 0.4   | 0.2   |       |           | 0.4     | 0.2  |
| Eosinophil (%)                                  | 1-6                       | 0.1      | 0.2      | 0.0     | 0.0   | 0.0   | 0.1    | 0.0   | 0.0   | 1.5   | 0.1   |       |           | 0.0     | 0.2  |
| Neutrophil (%)                                  | 40.0-80.0                 | 78.1     | 87.3     | 84.9    | 89.0  | 85.3  | 91.2   | 78.1  | 84.9  | 69.4  | 72.7  |       |           | 73.3    | 70.8 |
| Lymphocyte (%)                                  | 20-40                     | 14.2     | 8.3      | 10.6    | 8.2   | 9.7   | 6.3    | 15.2  | 10.6  | 20.0  | 13.2  |       |           | 13.7    | 21.3 |
| Monocyte (%)                                    | 2-10                      | 0.0      | 3.7      | 4.2     | 2.2   | 4.5   | 2.3    | 5.9   | 4.2   | 8.7   | 13.8  |       |           | 12.6    | 7.5  |
| Neutrophil Count (10 <sup>9</sup> /uL)          | 1.70-7.50                 | 11.10    | 11.63    | 16.73   | 12.10 | 17.61 | 17.26  | 11.09 | 16.73 | 3.69  | 6.44  |       |           | 6.05    | 4.35 |
| Lymphocyte Count (10 <sup>9</sup> /uL)          | 1.00-3.20                 | 2.02     | 1.10     | 2.08    | 1.11  | 2.01  | 1.20   | 2.15  | 2.08  | 1.06  | 1.17  |       |           | 1.13    | 1.31 |
| NLCR                                            | None                      | 5.50     | 10.57    | 8.04    | 10.90 | 8.76  | 14.28  | 5.16  | 8.04  | 3.48  | 5.50  |       |           | 5.35    | 3.32 |
| CRP (mg/dL)                                     | <0.50                     | 58.1     |          |         | 226.6 |       |        | 41.6  |       | 10.7  | 12.3  | 31.9  | 8.62 (Hs) | 17.9    |      |
| Albumin (g/dL)                                  | 3.50-5.20                 | 3.71     |          |         |       |       |        |       |       |       |       |       |           |         |      |
| Creatinine (mg/dL)                              | 0.55 – 1.02               | 0.50     | 0.50     |         |       |       | 0.50   | 0.80  |       | 0.90  | 0.60  | 0.50  |           |         |      |
| eGFR (mL/min/1.73m <sup>2</sup> )               | 86.0- 128.0               | 130.3    | 130.3    |         |       |       | 130.3  | 100.7 |       | 85.5  | 123.6 | 131.2 |           |         |      |
| AST (U/L)                                       | 10-35                     | 23       | 53       |         |       |       | 21     | 306   |       | 30    | 25    | 21    |           |         |      |
| ALT (U/L)                                       | 0-55                      | 23       | 55       |         |       |       | 57     | 273   |       | 25    | 24    | 24    |           |         |      |
| Prothrombin Time (seconds)                      | 9.8-12.6                  | 9.7      |          |         |       |       |        | 10.9  |       | 9.2   | 10.1  |       |           |         |      |
| Activated Partial Thromboplastin Time (seconds) | 31.0 - 47.0               | 33.4     |          |         | 35.3  |       |        | 31.6  |       | 36.0  | 37.0  |       | 32.9      |         | 37.9 |
| D-dimer (ug/mL)                                 | <440                      |          | 1110     |         | 930   |       | 3510   | 930   |       | 2600  | 1500  |       | 3120      | 2020    | 1250 |
| Fibrinogen (mg/dL)                              | 200-400                   |          |          |         |       |       |        |       |       | 579.7 | 502.3 |       |           |         |      |
| Ferritin (ng/mL)                                | 20.0 – 200.0              |          |          |         |       |       | 158.84 |       |       |       |       |       |           |         |      |
| LDH (U/L)                                       | 135-214                   |          | 240      |         |       |       | 287    |       |       |       |       |       |           |         |      |
| Procalcitonin (ng/mL)                           | <0.05                     | 0.06     |          |         |       |       |        | 0.53  |       | 0.08  | 0.06  |       |           |         |      |
| Na (mEq/L)                                      | 136-145                   | 136      |          |         |       | 141   |        | 136   |       | 137   | 129   | 131   |           |         |      |
| K (mEq/L)                                       | 3.5-5.1                   | 3.8      |          |         |       | 3.2   |        | 2.9   |       | 4.6   | 4.0   | 3.9   |           |         |      |
| Cl (mEq/L)                                      | 98-107                    | 103.1    |          |         |       | 102.0 |        | 95.0  |       | 104.6 | 98.5  | 100   |           |         |      |

|                          |             |      |          |  |  |  |      |      |  |              |      |              |          |          |          |
|--------------------------|-------------|------|----------|--|--|--|------|------|--|--------------|------|--------------|----------|----------|----------|
| Blood Glucose (mg/dL)    | 60-14       | 111  | 109      |  |  |  |      | 99   |  | 72           | 82   |              |          |          |          |
| Ureum (mg/dL)            | 15-40       | 14.7 |          |  |  |  | 35.4 | 19.2 |  | 23           | 16.0 | 16.0         |          |          |          |
| Albumin (g/dL)           | 3.50-5.20   |      |          |  |  |  |      |      |  |              |      | 3.33         |          |          |          |
| Uric Acid (mg/dL)        | 2.6-6       |      | 2.9      |  |  |  |      |      |  |              |      |              |          |          |          |
| SARS COV-2 Real Time PCR | Negative    |      | Positive |  |  |  |      |      |  |              |      |              | Positive | Positive | Positive |
| HbsAg                    | Non-Reative |      |          |  |  |  |      |      |  | Non Reactive |      | Non reactive |          |          |          |
